# Supplementary material for: Sewage remediation using solar energy and a triply fused Zn-porphyrin dimer molecular graphene photocatalytic agent
Source: Royal Society of Chemistry journal article supplement (doi:10.1039/d3cy01131c), 2023-01-01
Supplement: d3cy01131c1.pdf [file d3cy01131c1.pdf]

## Supporting Information

# Sewage Remediation Using Solar Energy and a Triply Fused Zn-Porphyrin Dimer Molecular Graphene Photocatalytic Agent

Fei Cheng,<sup>a</sup> Taotao Qiang,<sup>a\*</sup> Mingli Li,<sup>a</sup> Tony D. James<sup>b,c\*</sup>

<sup>a</sup> College of Bioresources and Materials Engineering, Shaanxi Collaborative Innovation Center of Industrial

Auxiliary Chemistry & Technology, Shaanxi University of Science & Technology, Xi'an, 710021, China.

<sup>b</sup> Department of Chemistry, University of Bath, Bath, BA27AY, UK.

<sup>c</sup> School of Chemistry and Chemical Engineering, Henan Normal University, Xinxiang 453007, China.

## Table of Contents

|                                                   |           |
|---------------------------------------------------|-----------|
| <b><u>Instrumentation and Materials</u></b> ..... | <b>3</b>  |
| <b><u>General Procedures</u></b> .....            | <b>4</b>  |
| <b><u>Compounds Data</u></b> .....                | <b>6</b>  |
| <b><u>NMR spectra</u></b> .....                   | <b>7</b>  |
| <b><u>Mass Spectra</u></b> .....                  | <b>11</b> |
| <b><u>Absorption spectra</u></b> .....            | <b>12</b> |
| <b><u>Application Experimental Data</u></b> ..... | <b>13</b> |
| <b><u>References</u></b> .....                    | <b>25</b> |

## **Instrumentation and Materials**

$^1\text{H}$  NMR (600 MHz) spectra were recorded on a Bruker AVANCE NEO 600MHz spectrometer, and chemical shifts were reported using the delta scale in ppm relative to  $\text{CHCl}_3$  as internal reference for  $^1\text{H}$  NMR ( $\delta = 7.260$  ppm). Absorption spectra were recorded on a Cary 5000 spectrometer. MALDI-TOF mass spectra were obtained with a Bruker ultraflex extreme MALDI-TOF/TOF spectrometer with matrix. Material surface morphology were observed on a FEI Verios 460 spectrometer. Dispersion of materials in aqueous solution were taken on an ALV/C spectrometer. Photogenic charge lifetime was recorded on an ultrafast systems helios spectrometer. Electrochemical data were measured by cyclic voltammetry on a PGSTAT 302N scanning electrochemical microscope. Free radical species were recorded on a CIQTEK EPR200-Plus spectrometer. Unless otherwise noted, materials obtained from commercial suppliers were used without further purification.

## General Procedures

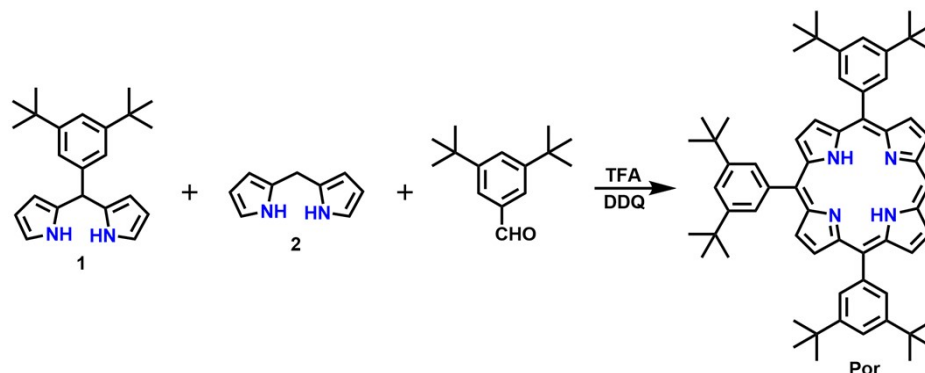

**Synthesis of Por**<sup>S1</sup>: 3,5 *di-tert*-butylphenyl-dipyrromethane **1** (3.34 g, 10.00 mmol), dipyrromethene **2** (1.46 g, 10.00 mmol), and 3,5 *di-tert*-butylbenzaldehyde (4.36 g, 20.00 mmol) were dissolved in CH<sub>2</sub>Cl<sub>2</sub> (1.5 L) and degassed for 15 min (bubbling N<sub>2</sub> through the solution). Boron fluoride ethyl ether (0.15 mL) was added and the reaction was stirred for 2 h at rt under the exclusion of light. 2,3-Dichloro-5,6-dicyano-1,4-benzoquinone (6.80 g, 30.00 mmol) was added and the mixture was stirred for further 4 h under air. The acid was quenched via the addition of NEt<sub>3</sub> (5 mL), the solvent was removed and the crude product purified by silica-gel column chromatography (CH<sub>2</sub>Cl<sub>2</sub>/petroleum ether as an eluent) and recrystallized from CH<sub>2</sub>Cl<sub>2</sub>/MeOH, **Por** (1.05 g, 1.20 mmol, 12% yield) was obtained as a purple solid.

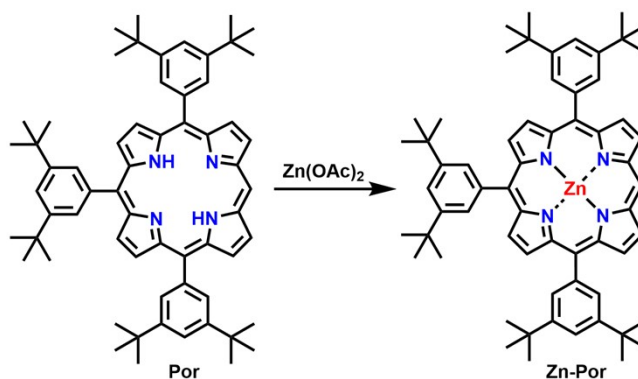

**Synthesis of Zn-Por**<sup>S2</sup>: **Por** (1.00 g, 1.10 mmol) was added to a round-bottomed 250 mL flask containing a magnetic stirring bar, and dissolved in CH<sub>2</sub>Cl<sub>2</sub> (100 mL)/MeOH (10 mL). Zn(OAc)<sub>2</sub> (0.61 g, 3.30 mmol) was added, after being stirred at 25 °C for 3 h. The reaction mixture was poured in to water and the products were extracted with CH<sub>2</sub>Cl<sub>2</sub>. The organic extracts were combined, washed with water, and dried over anhydrous sodium sulfate. The solvent was evaporated, and the product was recrystallization with CH<sub>2</sub>Cl<sub>2</sub>/MeOH, **Zn-Por** (1.02 g, 1.08 mmol, 99% yield) was obtained as a red solid.



## **Compounds Data**

**Por:**  $^1\text{H}$  NMR (600 MHz,  $\text{CDCl}_3$ ):  $\delta$  = 10.31 (s, 1H, *meso*-H), 9.46 (d,  $J$  = 4.8 Hz, 2H,  $\beta$ -H), 9.27 (d,  $J$  = 4.8 Hz, 2H,  $\beta$ -H), 9.20 (d,  $J$  = 4.8 Hz, 2H,  $\beta$ -H), 9.16 (d,  $J$  = 4.8 Hz, 2H,  $\beta$ -H), 8.35 (s, 4H, Ar-H), 8.32 (s, 2H, Ar-H), 8.03 (s, 2H, Ar-H), 8.01 (s, 1H, Ar-H), 1.76 (s, 36H, *t*-Bu-H), 1.73 (s, 18H, *t*-Bu-H), -2.64 (s, 2H, NH-H) ppm.

**Zn-Por:**  $^1\text{H}$  NMR (600 MHz,  $\text{CDCl}_3$ ):  $\delta$  = 10.26 (s, 1H, *meso*-H), 9.41 (d,  $J$  = 4.8 Hz, 2H,  $\beta$ -H), 9.15 (d,  $J$  = 4.8 Hz, 2H,  $\beta$ -H), 9.05 (d,  $J$  = 4.8 Hz, 2H,  $\beta$ -H), 9.03 (d,  $J$  = 4.8 Hz, 2H,  $\beta$ -H), 8.12 (d,  $J$  = 1.8 Hz, 4H, Ar-H), 8.09 (d,  $J$  = 1.8 Hz, 2H, Ar-H), 7.82 (s, 2H, Ar-H), 7.79 (s, 1H, Ar-H), 1.55 (s, 36H, *t*-Bu-H), 1.52 (s, 18H, *t*-Bu-H) ppm; UV/Vis ( $\text{CHCl}_2$ ):  $\lambda_{\text{max}}$  ( $\epsilon$  [ $\text{M}^{-1}\text{cm}^{-1}$ ]) = 422 (177000), 549 (6270), 588 (1640) nm.

**Oligo-Zn-Por:**  $^1\text{H}$  NMR (600 MHz,  $\text{CDCl}_3$ ):  $\delta$  = 7.75 (d,  $J$  = 4.8 Hz, 4H,  $\beta$ -H), 7.71 (d,  $J$  = 4.8 Hz, 4H,  $\beta$ -H), 7.67 (d,  $J$  = 1.8 Hz, 8H, Ar-H), 7.64 (d,  $J$  = 1.8 Hz, 4H, Ar-H), 7.62 (s, 4H, Ar-H), 7.59 (s, 2H, Ar-H), 7.35 (s, 4H,  $\beta$ -H), 1.46 (s, 72H, *t*-Bu-H), 1.42 (s, 36H, *t*-Bu-H) ppm;  $^{13}\text{C}$  NMR (151 MHz,  $\text{CDCl}_3$ ):  $\delta$  = 153.95, 153.53, 153.43, 153.03, 149.10, 148.78, 140.05, 135.67, 131.37, 131.12, 128.19, 127.46, 127.29, 126.18, 120.88, 120.78, 34.86, 31.62, 31.56 ppm; HR-MS (MALDI-TOF-MS)  $m/z$  = 1867.0891 [ $\text{M}$ ] $^+$ , calcd for  $(\text{C}_{124}\text{H}_{138}\text{N}_8\text{Zn}_2)^+ = 1866.9627$ ; UV/Vis ( $\text{CHCl}_3$ ):  $\lambda_{\text{max}}$  ( $\epsilon$  [ $\text{M}^{-1}\text{cm}^{-1}$ ]) = 413 (91000), 458 (32700), 576 (84000), 916 (11100), 1040 (22700) nm.

## NMR spectra

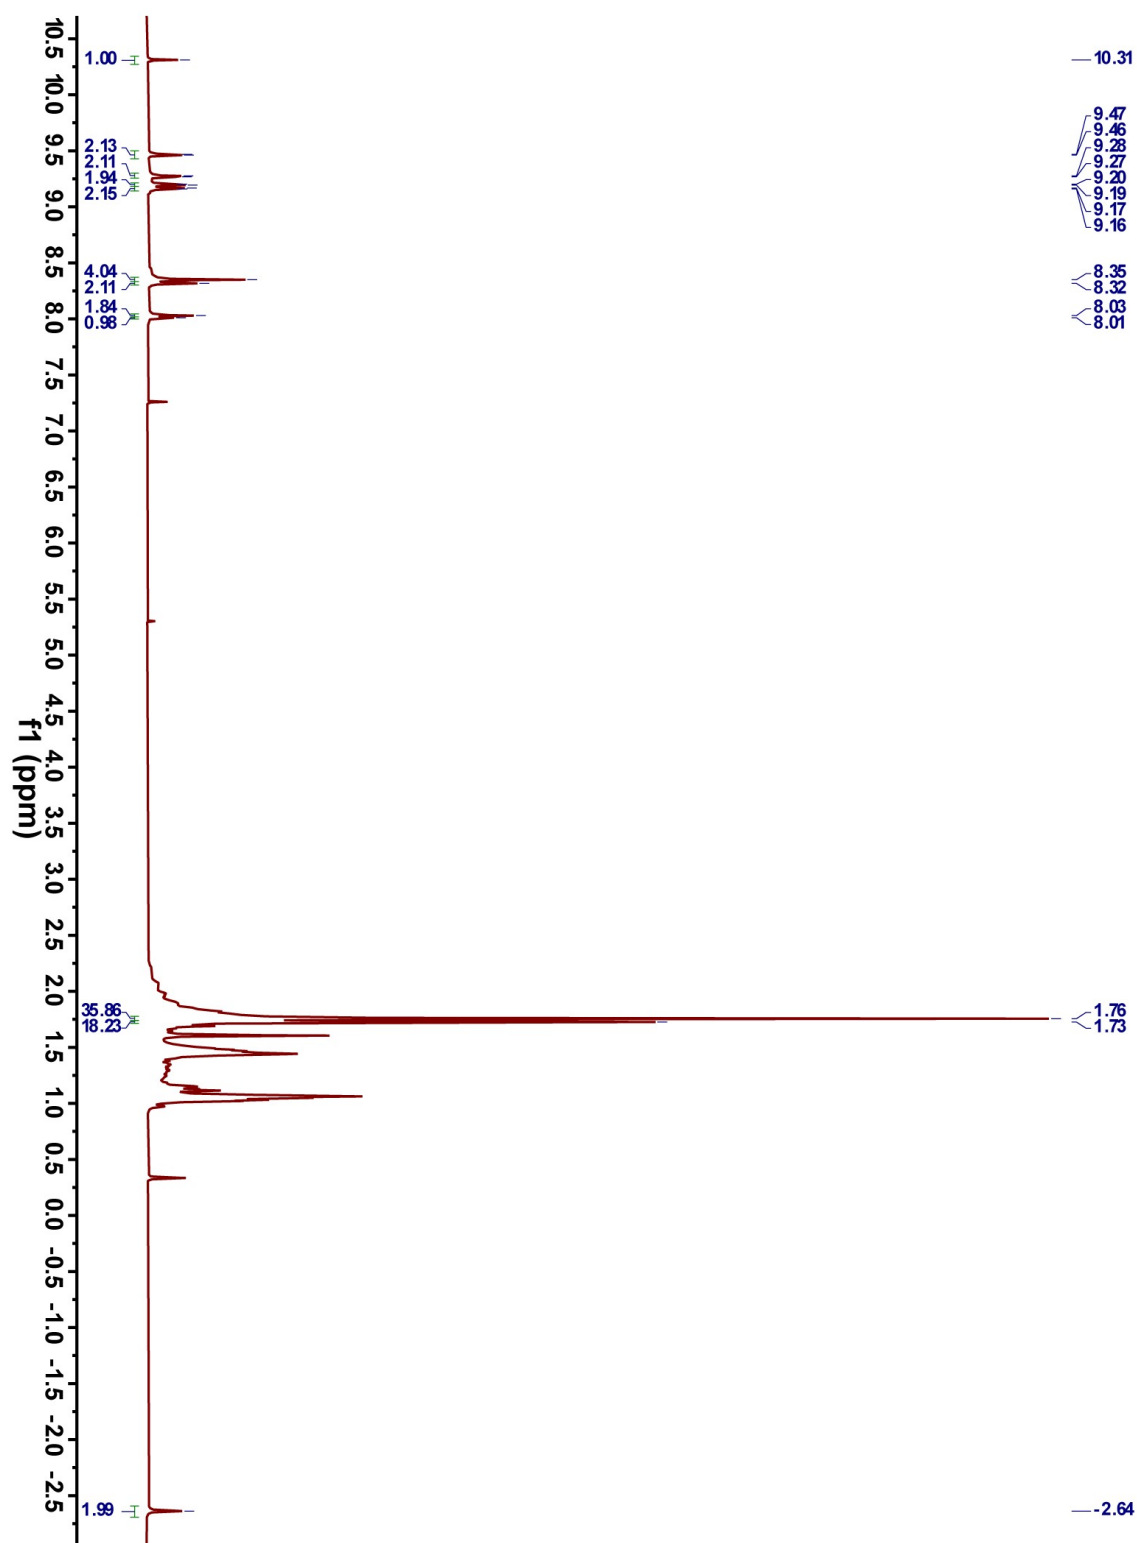

Figure S1.  $^1\text{H}$  NMR spectrum of **Por** in  $\text{CDCl}_3$ .

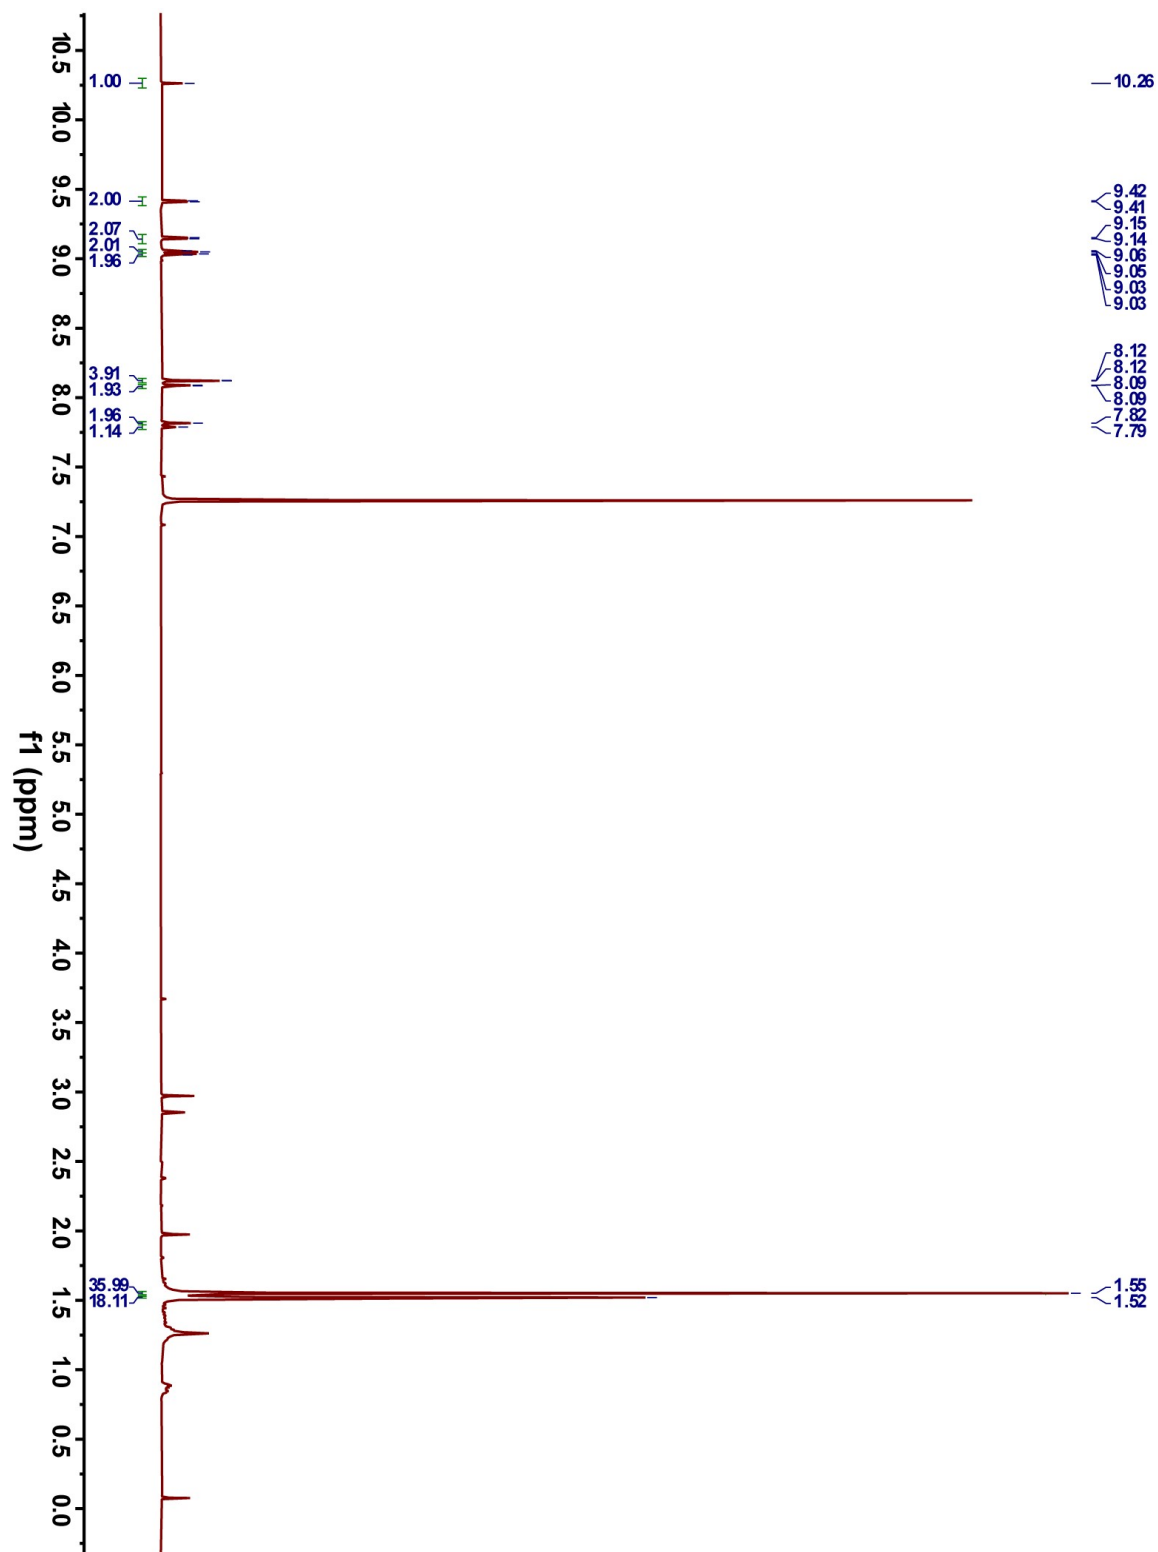

Figure S2.  $^1\text{H}$  NMR spectrum of **Zn-Por** in  $\text{CDCl}_3$ .

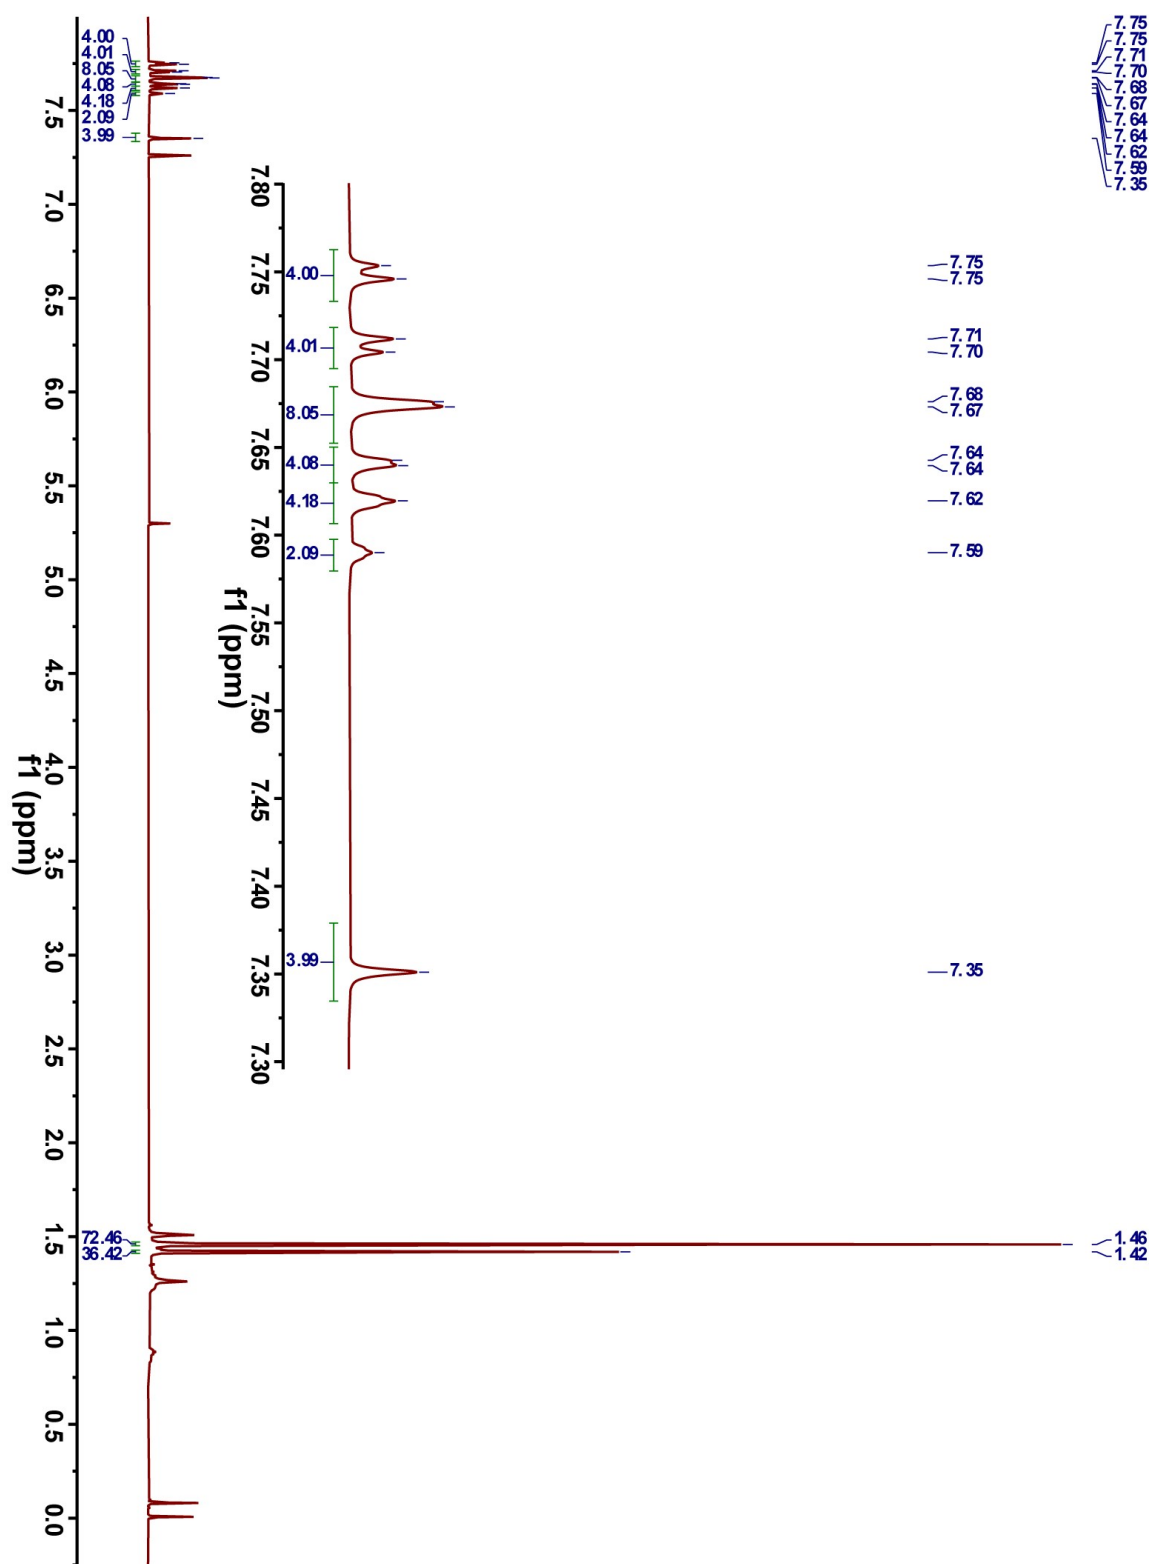

Figure S3.  $^1\text{H}$  NMR spectrum of **Oligo-Zn-Por** in  $\text{CDCl}_3$ .

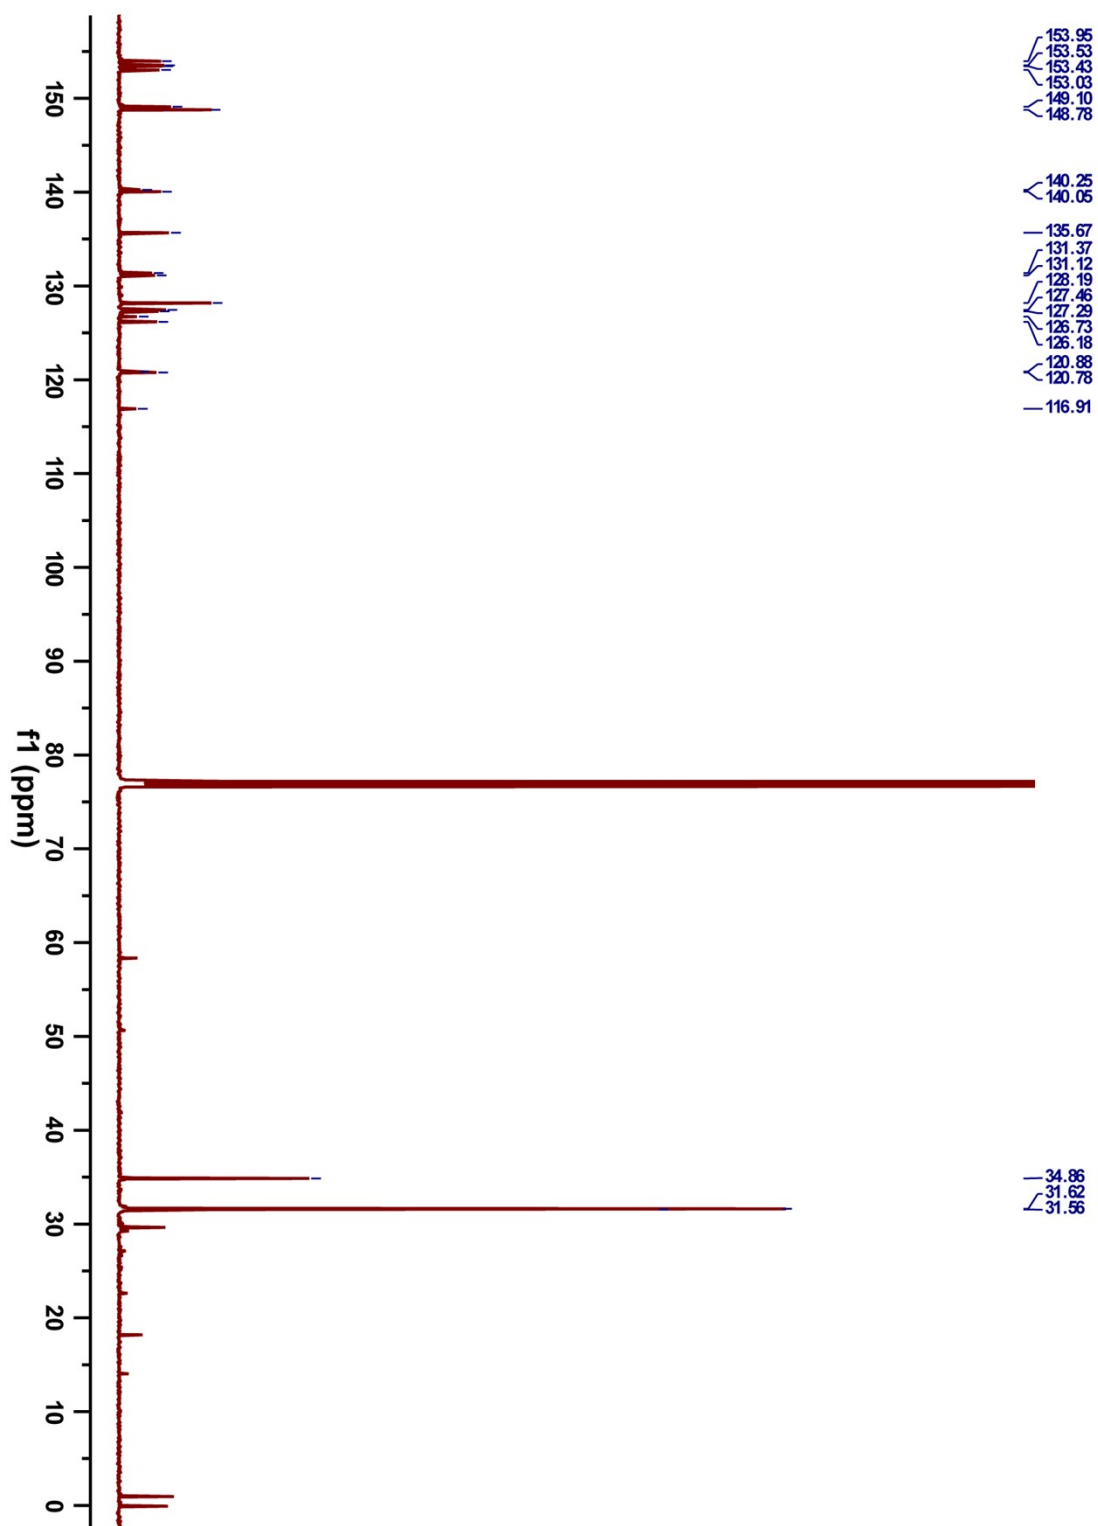

Figure S4.  $^{13}\text{C}$  NMR spectrum of **Oligo-Zn-Por** in  $\text{CDCl}_3$ .

## Mass Spectrum

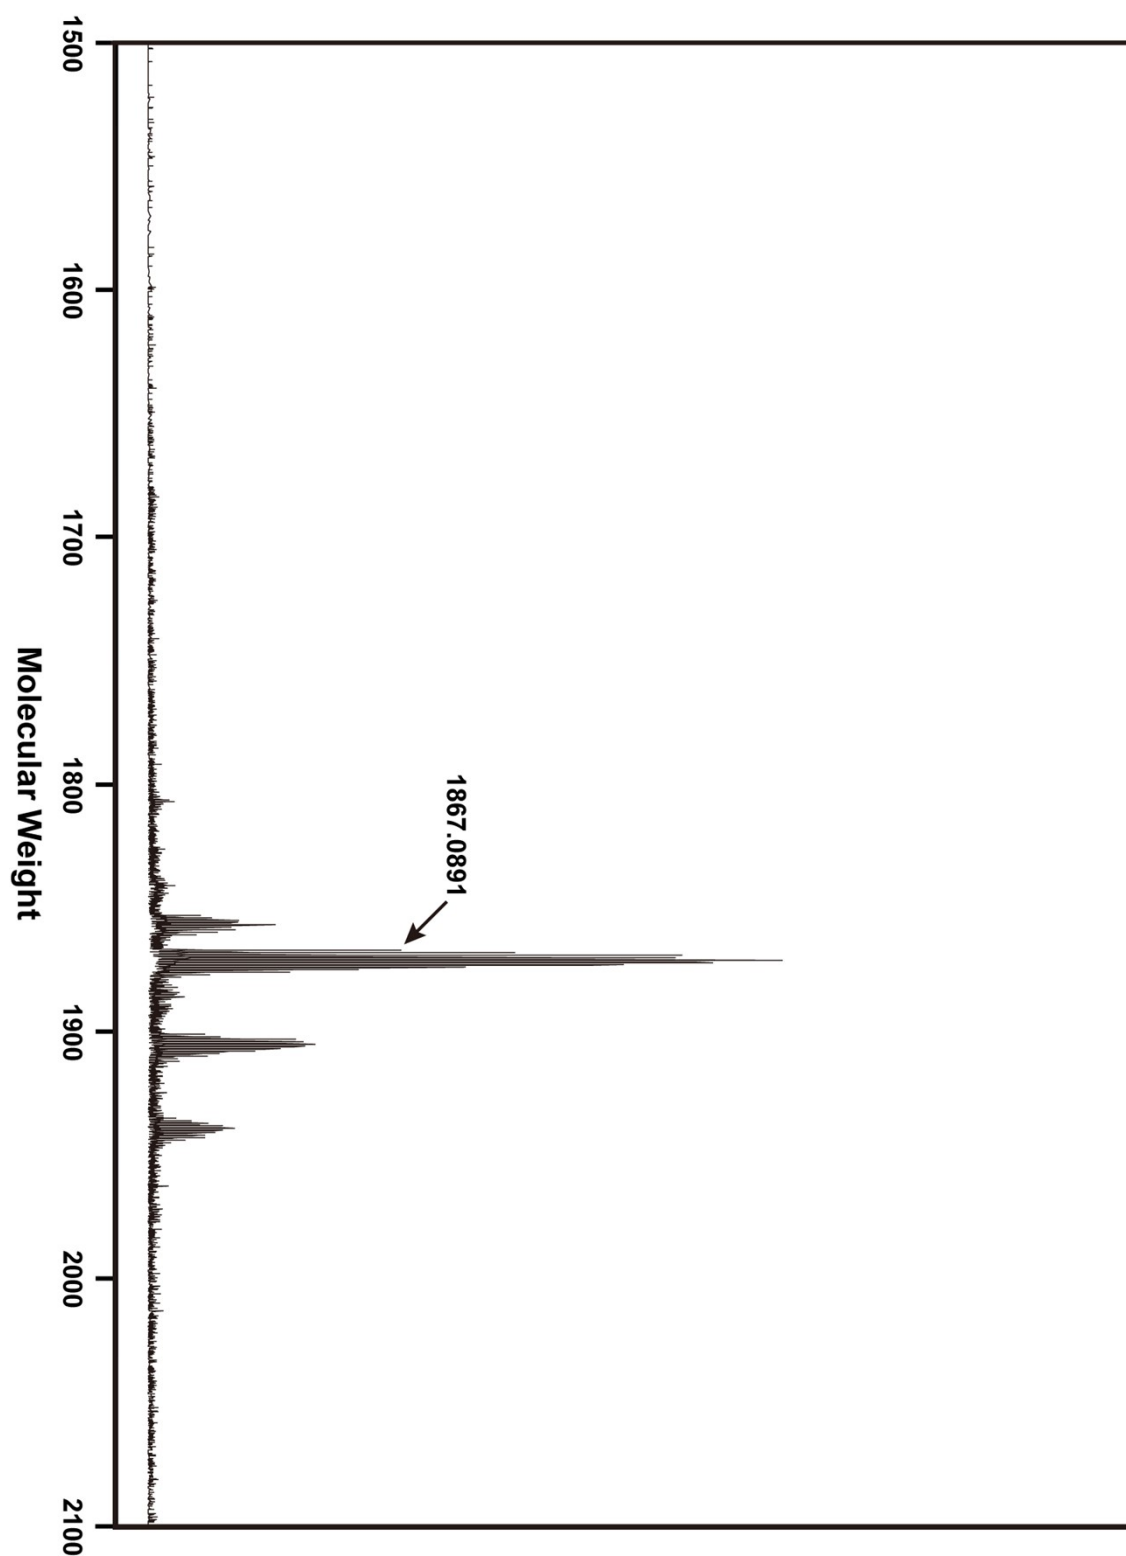

**Figure S5.** HR-MS spectrum of **Oligo-Zn-Por**

### Absorption spectra

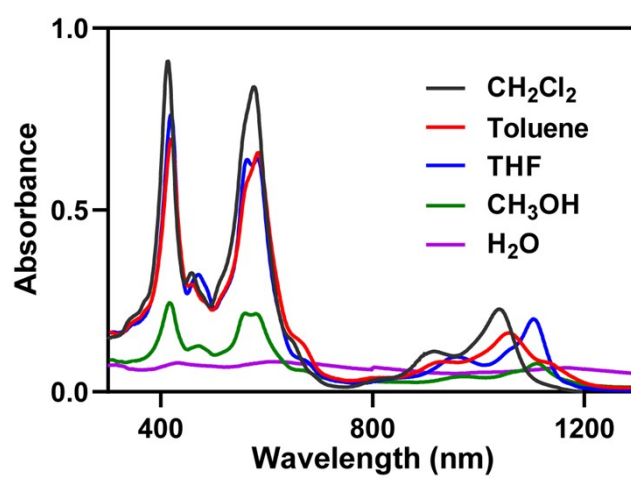

**Figure S6.** Absorption spectra of **Oligo-Zn-Por** in different solvent.

### Application Experimental Data

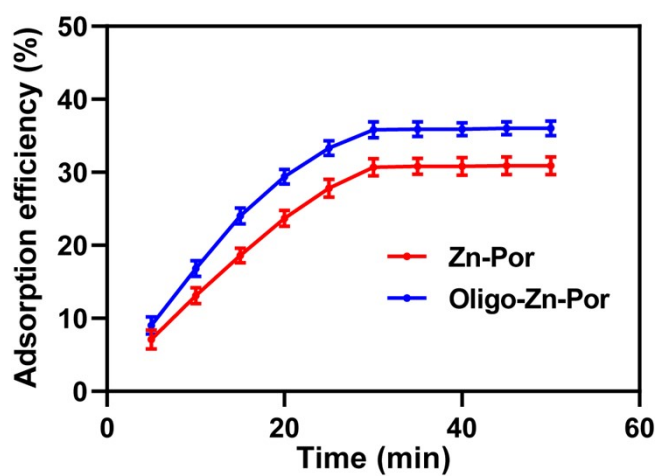

**Figure S7.** Effect of the amount of photocatalyst on the adsorption rate of Cr(VI) (The catalytic period was July, 2022, photocatalyst dosage of 5 mg, Cr(VI) concentration of 10 mg/L).

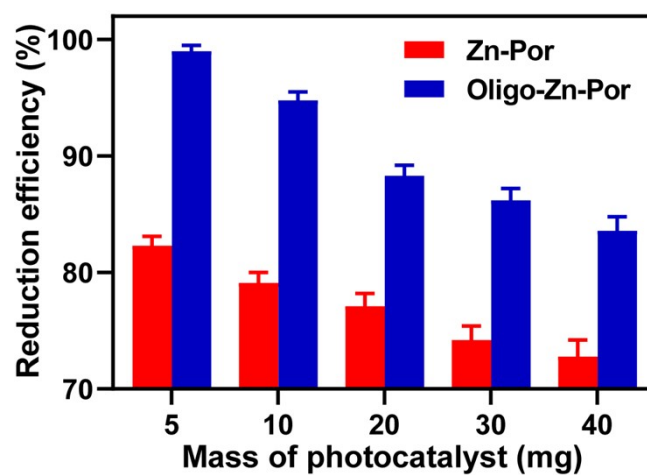

**Figure S8.** Effect of the amount of photocatalyst on the reduction rate of Cr(VI) (The catalytic period was July, 2022, Cr(VI) concentration is 10 mg/L).

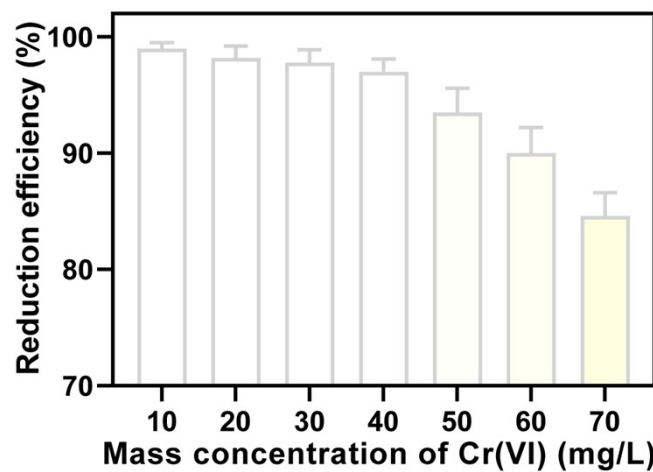

**Figure S9.** Effect of Cr(VI) concentration on reduction rate(The catalytic period was July, 2022, **Oligo-Zn-Por** dosage is 5 mg).

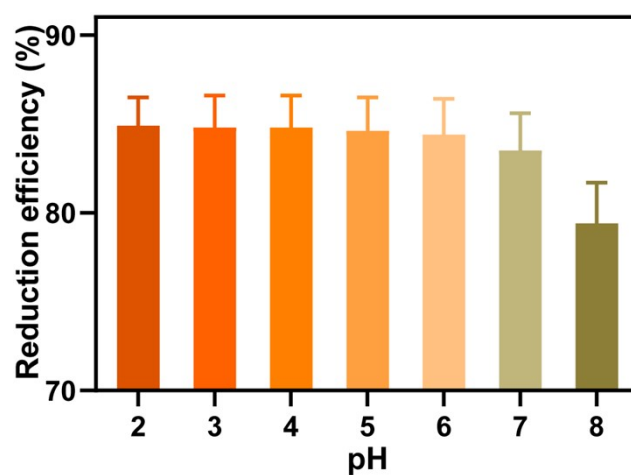

**Figure S10.** Effect of pH on reduction rate of Cr(VI) (The catalytic period was July, 2022, **Oligo-Zn-Por** dosage is 5 mg, Cr(VI) concentration is 70 mg/L).

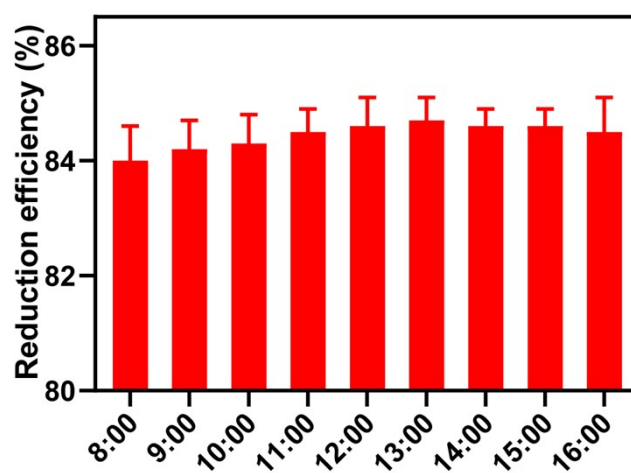

**Figure S11.** Effect of sunlight catalyzes at different times of the day on reduction rate of Cr(VI) (The catalytic period was July 15, 2022, **Oligo-Zn-Por** dosage is 5 mg, Cr(VI) concentration is 70 mg/L).

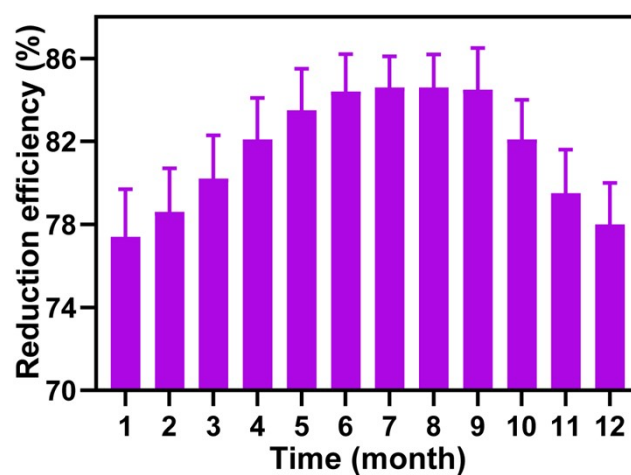

**Figure S12.** Effect of sunlight catalyzes at different times of the year on reduction rate of Cr(VI) (The catalytic period was July 2022, **Oligo-Zn-Por** dosage is 5 mg, Cr(VI) concentration is 70 mg/L).

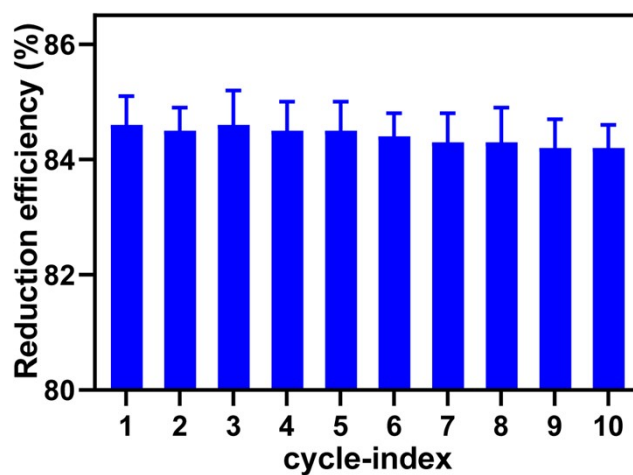

**Figure S13.** Effect of cycle-index on reduction rate of Cr(VI) (The catalytic period was July, 2022, **Oligo-Zn-Por** dosage is 5 mg, Cr(VI) concentration is 70 mg/L).

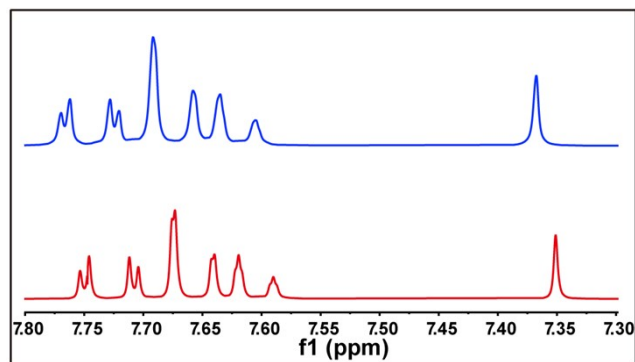

**Figure S14.** The cyclic stability of **Oligo-Zn-Por** was verified by  $^1\text{H}$  NMR (Red is the  $^1\text{H}$  NMR of **Oligo-Zn-Por** before the photocatalytic reaction, blue is the  $^1\text{H}$  NMR of **Oligo-Zn-Por** after photocatalytic reaction).

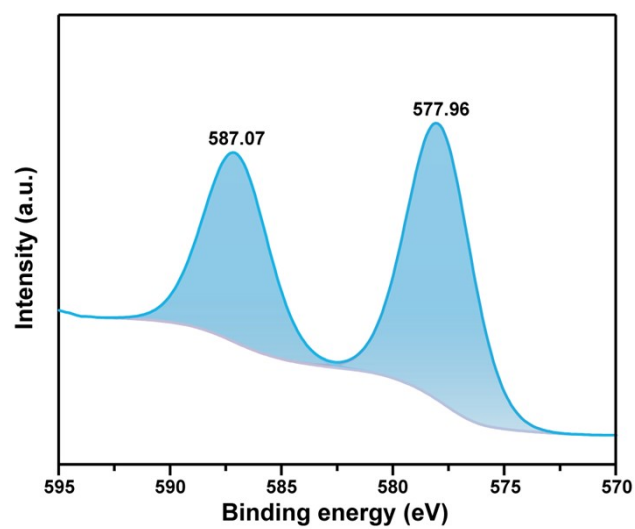

**Figure S15.** High-resolution Cr 2p XPS spectrum of **Oligo-Zn-Por** after the Cr(VI) reduction cyclic experiment.

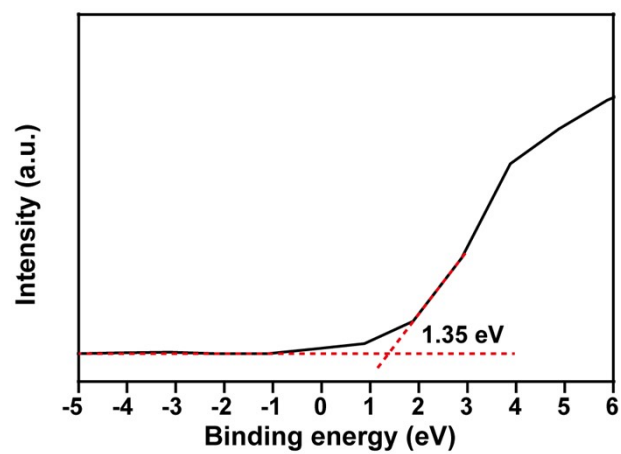

**Figure S16.** XPS valence band spectrum of Oligo-Zn-Por.

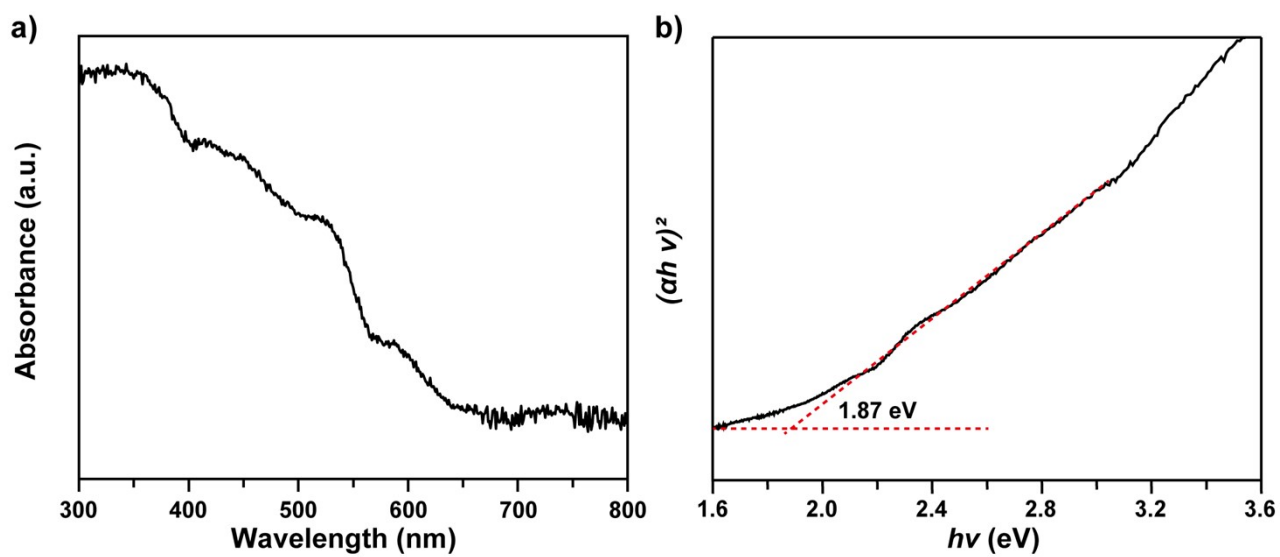

**Figure S17.** (a) Solid UV-visible absorption spectra of **Oligo-Zn-Por**, (b) the band edges of **Oligo-Zn-Por**.

Table S1

Comparison of reported literature on the photo-reduction of Cr(VI).

| Photocatalyst                                                  | Catalyst dosage (mg) | Initial Cr(VI) concentration (mg/L) | Solution volume (mL) | Photosource | Reduction efficiency | Refs.      |
|----------------------------------------------------------------|----------------------|-------------------------------------|----------------------|-------------|----------------------|------------|
| BCG-5                                                          | 30                   | 20                                  | 50                   | Xe lamp     | 81.51%               | 9          |
| ZnO/Bi <sub>2</sub> S <sub>3</sub>                             | 50                   | 20                                  | 50                   | Xe lamp     | 95%                  | S1         |
| Carbon dots-TiO <sub>2</sub>                                   | 50                   | 10                                  | 50                   | Xe lamp     | 99.2%                | S5         |
| RGO/ $\alpha$ -MnO <sub>2</sub>                                | 50                   | 10                                  | 50                   | Xe lamp     | 76%                  | S6         |
| Bi <sub>2</sub> WO <sub>6</sub>                                | 60                   | 10                                  | 50                   | Xe lamp     | 78%                  | S7         |
| CoS <sub>2</sub>                                               | 10                   | 20                                  | 20                   | Xe lamp     | 10.2%                | S8         |
| CdS                                                            | 30                   | 10                                  | 150                  | Xe lamp     | 13%                  | S9         |
| Bi <sub>2</sub> O <sub>3</sub> /Bi <sub>2</sub> S <sub>3</sub> | 25                   | 80                                  | 50                   | Xe lamp     | 91.8%                | S10        |
| CoS <sub>2</sub> /g-C <sub>3</sub> N <sub>4</sub> -rGO         | 10                   | 20                                  | 20                   | Xe lamp     | 72%                  | S11        |
| Oligo-Zn-Por                                                   | 5                    | 70                                  | 30                   | Sunlight    | 84.6%                | This study |

## References

- S1 M. M. Martin, D. Lungerich, P. Haines, F. Hampel and N. Jux, *Angew. Chem., Int. Ed.*, 2019, **58**, 8932-8937.
- S2 M. J. Plater, S. Aiken and G. Bourhill, *Tetrahedron*, 2002, **58**, 2415-2422.
- S3 A. Tsuda and A. Osuka, *Science*, 2001, **293**, 79-82.
- S4 F. P. Zhao, Y. P. Liu, S. B. Hammoud, B. Doshi, N. Guijarro, X. B. Min, C. J. Tang, M. Sillanpää, K. Sivulad and S. B. Wang, *Appl. Catal., B*, 2020, **272**, 119033.
- S5 Y. R. Li, Z. M. Liu, Y. C. Wu, J. T. Chen, J. Y. Zhao, F. M. Jin and P. Na, *Appl. Catal., B*, 2018, **224**, 508-517.
- S6 D. k. Padhi, A. Baral, K. Parida, S. K. Singh and M. K. Ghosh, *J. Phys. Chem. C*, 2017, **121**, 6039-6049.
- S7 F. Xu, H. M. Chen, C. Y. Xu, D. P. Wu, Z. Y. Gao, Q. Zhang and K. Jiang, *J. Colloid Interface Sci.*, 2018, **525**, 97-106.
- S8 Y. J. Wang, S. Y. Bao, Y. Q. Liu, W. W. Yang, Y. S. Yu, M. Feng and K. F. Li, *Appl. Surf. Sci.*, 2020, **510**, 145495.
- S9 F. Deng, X. Y. Lu, Y. B. Luo, J. Wang, W. J. Che, R. J. Yang, X. B. Luo, S. L. Luo and D. D. Dionysiou, *Chem. Eng. J.*, 2019, **361**, 1451-1461.
- S10 Y. Sang, X. Cao, G. D. Dai, L. X Wang, Y. Peng and B. Y. Geng, *J. Hazard. Mater.*, 2020, **381**, 120942.
- S11 X. Zhang, W. W. Yang, M. Y. Gao, H. Liu, K. F. Li, Y. S. Yu, *Green, Energy Environ.*, 2022, **7**, 66-74.
